# Supplementary material for: Rap1A promotes esophageal squamous cell carcinoma metastasis through the AKT signaling pathway
Source: PubMed Central journal article supplement — Oncol Rep. 2019 Sep 12;42(5):1815–24. doi: 10.3892/or.2019.7309 (PMC6775818; doi:10.3892/or.2019.7309), 2019-09-12
Supplement: Supplementary_Data.pdf [file Supplementary_Data.pdf]

Table SI. Details of the patients who provide both ESCC and ANTT samples.

| Patients | Pathology | Sex    | Age (years) | Clinical staging according to AJCC (8th edition) |         |         |           | SI of IHC |
|----------|-----------|--------|-------------|--------------------------------------------------|---------|---------|-----------|-----------|
|          |           |        |             | T stage                                          | N stage | M stage | TNM stage |           |
| 1        | ESCC      | Male   | 65          | T3                                               | N0      | M0      | II        | 1         |
|          | ANTT      |        |             |                                                  |         |         |           | 1         |
| 2        | ESCC      | Male   | 56          | T3                                               | N1      | M0      | III       | 0         |
|          | ANTT      |        |             |                                                  |         |         |           | 0         |
| 3        | ESCC      | Male   | 60          | T3                                               | N1      | M0      | III       | 2         |
|          | ANTT      |        |             |                                                  |         |         |           | 2         |
| 4        | ESCC      | Male   | 64          | T3                                               | N0      | M0      | II        | 8         |
|          | ANTT      |        |             |                                                  |         |         |           | 1         |
| 5        | ESCC      | Male   | 59          | T3                                               | N0      | M0      | II        | 1         |
|          | ANTT      |        |             |                                                  |         |         |           | 0         |
| 6        | ESCC      | Male   | 57          | T2                                               | N1      | M0      | II        | 6         |
|          | ANTT      |        |             |                                                  |         |         |           | 2         |
| 7        | ESCC      | Female | 58          | T3                                               | N1      | M0      | III       | 3         |
|          | ANTT      |        |             |                                                  |         |         |           | 2         |
| 8        | ESCC      | Male   | 70          | T3                                               | N0      | M0      | II        | 4         |
|          | ANTT      |        |             |                                                  |         |         |           | 3         |
| 9        | ESCC      | Female | 74          | T3                                               | N1      | M0      | III       | 3         |
|          | ANTT      |        |             |                                                  |         |         |           | 1         |
| 10       | ESCC      | Male   | 66          | T3                                               | N0      | M0      | II        | 12        |
|          | ANTT      |        |             |                                                  |         |         |           | 1         |
| 11       | ESCC      | Female | 52          | T3                                               | N1      | M0      | III       | 8         |
|          | ANTT      |        |             |                                                  |         |         |           | 2         |
| 12       | ESCC      | Male   | 75          | T3                                               | N0      | M0      | II        | 1         |
|          | ANTT      |        |             |                                                  |         |         |           | 1         |
| 13       | ESCC      | Male   | 51          | T3                                               | N0      | M0      | II        | 0         |
|          | ANTT      |        |             |                                                  |         |         |           | 1         |
| 14       | ESCC      | Male   | 51          | T3                                               | N2      | M0      | II        | 4         |
|          | ANTT      |        |             |                                                  |         |         |           | 1         |
| 15       | ESCC      | Male   | 59          | T3                                               | N2      | M0      | II        | 8         |
|          | ANTT      |        |             |                                                  |         |         |           | 2         |
| 16       | ESCC      | Female | 73          | T3                                               | N0      | M0      | II        | 12        |
|          | ANTT      |        |             |                                                  |         |         |           | 4         |
| 17       | ESCC      | Male   | 63          | T3                                               | N1      | M0      | III       | 3         |
|          | ANTT      |        |             |                                                  |         |         |           | 1         |
| 18       | ESCC      | Male   | 51          | T3                                               | N2      | M0      | III       | 3         |
|          | ANTT      |        |             |                                                  |         |         |           | 1         |
| 19       | ESCC      | Male   | 60          | T3                                               | N2      | M0      | III       | 1         |
|          | ANTT      |        |             |                                                  |         |         |           | 0         |
| 20       | ESCC      | Female | 50          | T3                                               | N0      | M0      | II        | 4         |
|          | ANTT      |        |             |                                                  |         |         |           | 3         |
| 21       | ESCC      | Male   | 71          | T3                                               | N2      | M0      | III       | 3         |
|          | ANTT      |        |             |                                                  |         |         |           | 0         |
| 22       | ESCC      | Male   | 51          | T2                                               | N1      | M0      | II        | 2         |
|          | ANTT      |        |             |                                                  |         |         |           | 0         |
| 23       | ESCC      | Male   | 64          | T4b                                              | N3      | M0      | IVa       | 2         |
|          | ANTT      |        |             |                                                  |         |         |           | 2         |
| 24       | ESCC      | Male   | 64          | T3                                               | N0      | M0      | II        | 1         |
|          | ANTT      |        |             |                                                  |         |         |           | 1         |
| 25       | ESCC      | Male   | 55          | T2                                               | N1      | M0      | II        | 2         |
|          | ANTT      |        |             |                                                  |         |         |           | 1         |
| 26       | ESCC      | Male   | 52          | T3                                               | N1      | M0      | III       | 2         |
|          | ANTT      |        |             |                                                  |         |         |           | 1         |
| 27       | ESCC      | Male   | 59          | T3                                               | N3      | M0      | IVa       | 1         |
|          | ANTT      |        |             |                                                  |         |         |           | 0         |

Table SI. Continued.

| Patients | Pathology | Sex    | Age (years) | Clinical staging according to AJCC (8th edition) |         |         |           | SI of IHC |
|----------|-----------|--------|-------------|--------------------------------------------------|---------|---------|-----------|-----------|
|          |           |        |             | T stage                                          | N stage | M stage | TNM stage |           |
| 28       | ESCC      | Male   | 70          | T3                                               | N1      | M0      | III       | 1         |
|          | ANTT      |        |             |                                                  |         |         |           | 0         |
| 29       | ESCC      | Male   | 65          | T3                                               | N0      | M0      | II        | 4         |
|          | ANTT      |        |             |                                                  |         |         |           | 2         |
| 30       | ESCC      | Male   | 63          | T2                                               | N1      | M0      | II        | 3         |
|          | ANTT      |        |             |                                                  |         |         |           | 1         |
| 31       | ESCC      | Female | 67          | T3                                               | N0      | M0      | II        | 8         |
|          | ANTT      |        |             |                                                  |         |         |           | 1         |
| 32       | ESCC      | Male   | 48          | T3                                               | N1      | M0      | III       | 3         |
|          | ANTT      |        |             |                                                  |         |         |           | 1         |
| 33       | ESCC      | Male   | 53          | T3                                               | N1      | M0      | III       | 1         |
|          | ANTT      |        |             |                                                  |         |         |           | 0         |
| 34       | ESCC      | Male   | 69          | T3                                               | N1      | M0      | III       | 2         |
|          | ANTT      |        |             |                                                  |         |         |           | 1         |
| 35       | ESCC      | Male   | 61          | T3                                               | N1      | M0      | III       | 3         |
|          | ANTT      |        |             |                                                  |         |         |           | 1         |
| 36       | ESCC      | Male   | 77          | T3                                               | N0      | M0      | II        | 4         |
|          | ANTT      |        |             |                                                  |         |         |           | 2         |
| 37       | ESCC      | Male   | 61          | T3                                               | N1      | M0      | III       | 8         |
|          | ANTT      |        |             |                                                  |         |         |           | 2         |
| 38       | ESCC      | Male   | 59          | T3                                               | N0      | M0      | II        | 0         |
|          | ANTT      |        |             |                                                  |         |         |           | 1         |
| 39       | ESCC      | Female | 56          | T4b                                              | N0      | M0      | IVa       | 0         |
|          | ANTT      |        |             |                                                  |         |         |           | 0         |
| 40       | ESCC      | Female | 68          | T3                                               | N0      | M0      | II        | 2         |
|          | ANTT      |        |             |                                                  |         |         |           | 1         |
| 41       | ESCC      | Male   | 77          | T3                                               | N0      | M0      | II        | 3         |
|          | ANTT      |        |             |                                                  |         |         |           | 0         |
| 42       | ESCC      | Male   | 57          | T2                                               | N1      | M0      | II        | 4         |
|          | ANTT      |        |             |                                                  |         |         |           | 1         |
| 43       | ESCC      | Male   | 61          | T3                                               | N0      | M0      | II        | 2         |
|          | ANTT      |        |             |                                                  |         |         |           | 1         |
| 44       | ESCC      | Male   | 68          | T3                                               | N3      | M0      | IVa       | 4         |
|          | ANTT      |        |             |                                                  |         |         |           | 2         |
| 45       | ESCC      | Female | 72          | T3                                               | N0      | M0      | II        | 3         |
|          | ANTT      |        |             |                                                  |         |         |           | 1         |
| 46       | ESCC      | Male   | 57          | T3                                               | N0      | M0      | II        | 3         |
|          | ANTT      |        |             |                                                  |         |         |           | 0         |
| 47       | ESCC      | Male   | 74          | T3                                               | N0      | M0      | II        | 8         |
|          | ANTT      |        |             |                                                  |         |         |           | 2         |
| 48       | ESCC      | Male   | 72          | T2                                               | N2      | M0      | III       | 8         |
|          | ANTT      |        |             |                                                  |         |         |           | 2         |
| 49       | ESCC      | Female | 65          | T3                                               | N0      | M0      | II        | 4         |
|          | ANTT      |        |             |                                                  |         |         |           | 2         |
| 50       | ESCC      | Male   | 75          | T3                                               | N0      | M0      | II        | 2         |
|          | ANTT      |        |             |                                                  |         |         |           | 1         |
| 51       | ESCC      | Female | 63          | T3                                               | N0      | M0      | II        | 3         |
|          | ANTT      |        |             |                                                  |         |         |           | 1         |
| 52       | ESCC      | Female | 73          | T3                                               | N2      | M0      | III       | 4         |
|          | ANTT      |        |             |                                                  |         |         |           | 1         |
| 53       | ESCC      | Male   | 76          | T3                                               | N0      | M0      | II        | 2         |
|          | ANTT      |        |             |                                                  |         |         |           | 0         |
| 54       | ESCC      | Male   | 61          | T3                                               | N1      | M0      | III       | 8         |
|          | ANTT      |        |             |                                                  |         |         |           | 2         |

Table SI. Continued.

| Patients | Pathology | Sex    | Age (years) | Clinical staging according to AJCC (8th edition) |         |         |           | SI of IHC |
|----------|-----------|--------|-------------|--------------------------------------------------|---------|---------|-----------|-----------|
|          |           |        |             | T stage                                          | N stage | M stage | TNM stage |           |
| 55       | ESCC      | Male   | 79          | T2                                               | N3      | M0      | IVa       | 3         |
|          | ANTT      |        |             |                                                  |         |         |           | 1         |
| 56       | ESCC      | Male   | 72          | T3                                               | N1      | M0      | III       | 8         |
|          | ANTT      |        |             |                                                  |         |         |           | 2         |
| 57       | ESCC      | Male   | 54          | T3                                               | N1      | M0      | III       | 3         |
|          | ANTT      |        |             |                                                  |         |         |           | 1         |
| 58       | ESCC      | Male   | 76          | T2                                               | N1      | M0      | II        | 1         |
|          | ANTT      |        |             |                                                  |         |         |           | 1         |
| 59       | ESCC      | Male   | 65          | T3                                               | N3      | M0      | IVa       | 8         |
|          | ANTT      |        |             |                                                  |         |         |           | 1         |
| 60       | ESCC      | Female | 68          | T3                                               | N1      | M0      | III       | 4         |
|          | ANTT      |        |             |                                                  |         |         |           | 2         |
| 61       | ESCC      | Male   | 81          | T3                                               | N1      | M0      | III       | 2         |
|          | ANTT      |        |             |                                                  |         |         |           | 1         |
| 62       | ESCC      | Male   | 64          | T3                                               | N1      | M0      | III       | 1         |
|          | ANTT      |        |             |                                                  |         |         |           | 2         |
| 63       | ESCC      | Female | 71          | T1b                                              | N1      | M0      | I         | 1         |
|          | ANTT      |        |             |                                                  |         |         |           | 1         |
| 64       | ESCC      | Male   | 48          | T3                                               | N2      | M0      | III       | 8         |
|          | ANTT      |        |             |                                                  |         |         |           | 3         |
| 65       | ESCC      | Male   | 76          | T1b                                              | N1      | M0      | I         | 4         |
|          | ANTT      |        |             |                                                  |         |         |           | 1         |
| 66       | ESCC      | Male   | 52          | T2                                               | N1      | M0      | II        | 4         |
|          | ANTT      |        |             |                                                  |         |         |           | 1         |
| 67       | ESCC      | Female | 68          | T3                                               | N1      | M0      | III       | 4         |
|          | ANTT      |        |             |                                                  |         |         |           | 1         |
| 68       | ESCC      | Female | 74          | T1b                                              | N1      | M0      | I         | 8         |
|          | ANTT      |        |             |                                                  |         |         |           | 1         |
| 69       | ESCC      | Male   | 63          | T1a                                              | N1      | M0      | I         | 4         |
|          | ANTT      |        |             |                                                  |         |         |           | 0         |
| 70       | ESCC      | Male   | 52          | T3                                               | N1      | M0      | III       | 2         |
|          | ANTT      |        |             |                                                  |         |         |           | 1         |

ESCC, esophageal squamous cell carcinoma; ANTT, adjacent non-tumor tissues; SI, scoring index; IHC, immunohistochemistry; AJCC, American Joint Committee on Cancer.

Table SII. Details of the patients who provided ESCC samples only.

| Patients | Pathology | Sex    | Age (years) | Clinical staging according to AJCC (8th edition) |         |         |           | SI of IHC |
|----------|-----------|--------|-------------|--------------------------------------------------|---------|---------|-----------|-----------|
|          |           |        |             | T stage                                          | N stage | M stage | TNM stage |           |
| 1        | ESCC      | Male   | 73          | T3                                               | N1      | M0      | III       | 3         |
| 2        | ESCC      | Male   | 73          | T3                                               | N0      | M0      | II        | 1         |
| 3        | ESCC      | Female | 56          | T3                                               | N0      | M0      | II        | 3         |
| 4        | ESCC      | Female | 71          | T3                                               | N0      | M0      | II        | 3         |
| 5        | ESCC      | Female | 81          | T2                                               | N0      | M0      | II        | 0         |
| 6        | ESCC      | Female | 67          | T3                                               | N2      | M0      | III       | 8         |
| 7        | ESCC      | Male   | 72          | T3                                               | N0      | M0      | II        | 2         |
| 8        | ESCC      | Male   | 69          | T3                                               | N1      | M0      | III       | 3         |
| 9        | ESCC      | Male   | 72          | T3                                               | N2      | M0      | III       | 1         |
| 10       | ESCC      | Male   | 74          | T3                                               | N2      | M0      | III       | 4         |
| 11       | ESCC      | Male   | 73          | T3                                               | N0      | M0      | II        | 3         |
| 12       | ESCC      | Male   | 51          | T3                                               | N0      | M0      | II        | 8         |
| 13       | ESCC      | Male   | 49          | T3                                               | N2      | M0      | III       | 3         |
| 14       | ESCC      | Female | 82          | T3                                               | N2      | M0      | III       | 8         |
| 15       | ESCC      | Male   | 65          | T3                                               | N1      | M0      | III       | 4         |
| 16       | ESCC      | Male   | 80          | T3                                               | N1      | M0      | III       | 4         |
| 17       | ESCC      | Female | 79          | T3                                               | N0      | M0      | II        | 6         |
| 18       | ESCC      | Male   | 50          | T3                                               | N2      | M0      | III       | 4         |
| 19       | ESCC      | Male   | 54          | T4b                                              | N2      | M0      | IVa       | 8         |
| 20       | ESCC      | Female | 74          | T3                                               | N0      | M0      | II        | 12        |
| 21       | ESCC      | Male   | 62          | T3                                               | N2      | M0      | III       | 8         |
| 22       | ESCC      | Female | 74          | T3                                               | N0      | M0      | II        | 8         |
| 23       | ESCC      | Male   | 74          | T3                                               | N2      | M0      | III       | 3         |
| 24       | ESCC      | Male   | 79          | T3                                               | N1      | M0      | III       | 12        |
| 25       | ESCC      | Male   | 65          | T3                                               | N1      | M0      | III       | 2         |

ESCC, esophageal squamous cell carcinoma; ANTT, adjacent non-tumor tissues; SI, scoring index; IHC, immunohistochemistry; AJCC, American Joint Committee on Cancer.
